# Supplementary material for: In situ monitoring of electrophoretic deposition of Cu2ZnSnS4 nanocrystals
Source: Royal Society of Chemistry journal article supplement (doi:10.1039/c3ra23093g), 2013-01-01
Supplement: c3ra23093g.pdf [file c3ra23093g.pdf]

## Supplementary Information

### Transmission electron microscopy (TEM)

Transmission electron microscopy images of the used CZTS NCs are shown in Fig. Drops of diluted CZTS-dispersion were given onto a gold grid before being analyzed. Residual dispersant was removed by filter paper. A LaB6 cathodes electron source was operated at 120 kV acceleration voltage. The set up was also used to perform a compositional analysis of the particles via energy dispersive x-ray measurements (EDX). The data is shown in Tab. I. The analysis of the particles show a sulfur poor/copper rich composition. The data was acquired inside the TEM.

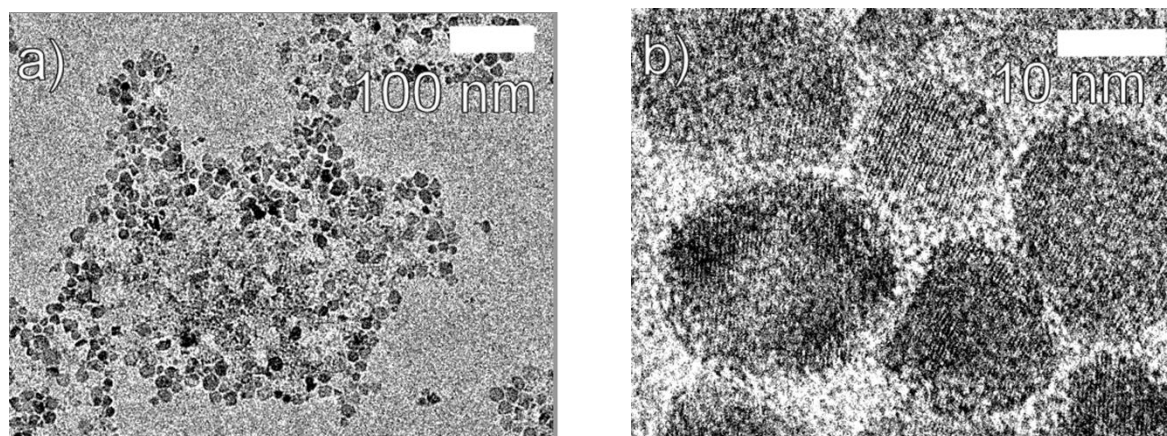

[Figure A1]: TEM images of the CZTS NCs used for electrophoretic deposition. NCs show an average size of  $(18.0 \pm 4.0)$  nm.

Tab. I Elemental composition of the used nanocrystals determined by EDX measurements

| Element (Peak) | Weight % | Atomic % |
|----------------|----------|----------|
| S (K)          | 25.7     | 45.4     |
| Cu (K)         | 31.7     | 28.2     |
| Zn (K)         | 15.4     | 13.4     |
| Sn (K)         | 27.2     | 13.00    |

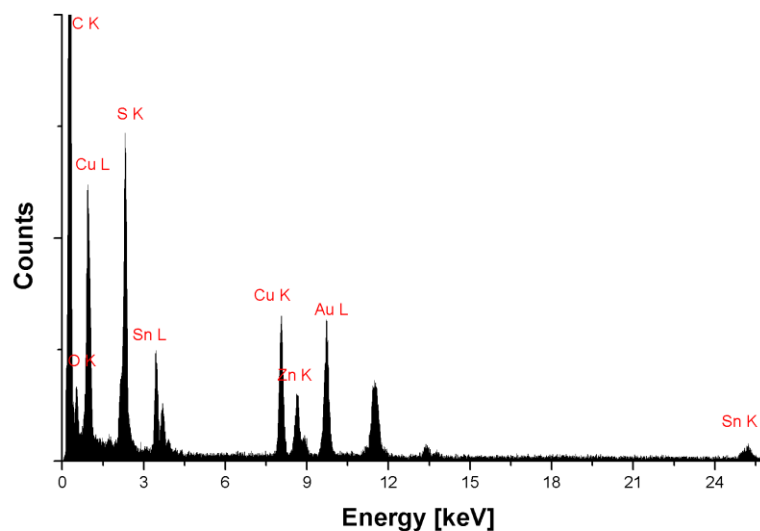

[Figure A2] EDX spectra of the CZTS NCs

### EPD and monitoring set-up

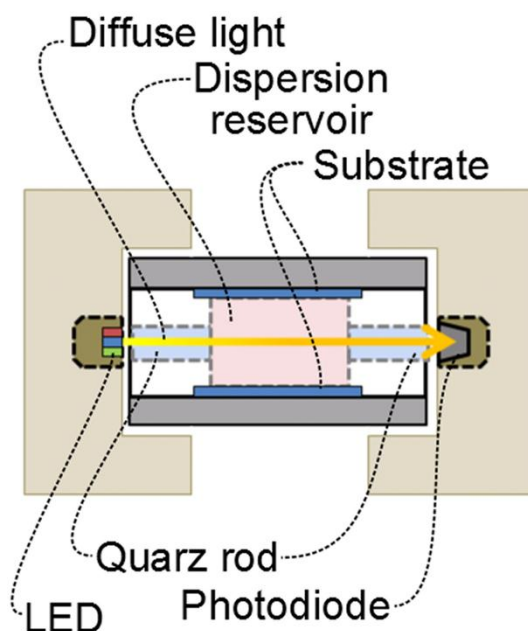

[Figure A3] Top view representation of the Set-up used for the electrophoretic deposition and process monitoring.

### Cu<sub>2</sub>ZnSnS<sub>4</sub> layers

The layer thickness was determined by SEM cross section images. Values concerning the thickness were taken at 8 – 12 positions. An average value was calculated and the standard deviation served as an error. The samples were analyzed with a tilt of  $\alpha = 16^\circ$ , considered by multiplying the measured data by  $\cos\alpha \cong 1.4$  during thickness determination. Cross section SEM images of the layers are shown in Fig. A3.

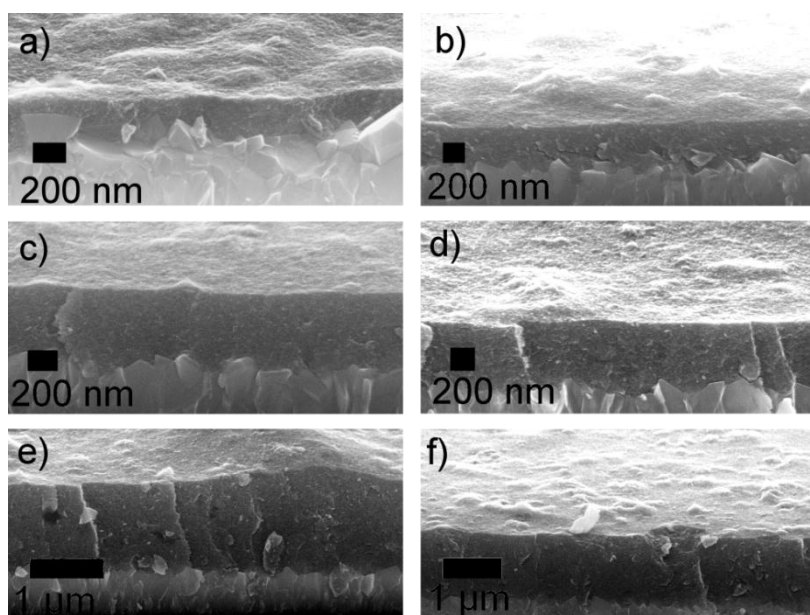

[Figure A4] Cross section SEM-micrographs of deposited layers for different CZTS concentration: a) 1.5  $\mu\text{l}$  b) 3  $\mu\text{l}$  c) 4  $\mu\text{l}$  d) 6  $\mu\text{l}$  e) 10  $\mu\text{l}$  f) 15  $\mu\text{l}$  of mother dispersion were dissolved in a mixture of acetonitrile and toluene.

Figure A4 shows photographs of  $\text{Cu}_2\text{ZnSnS}_4$  layers on Mo and FTO Substrates.

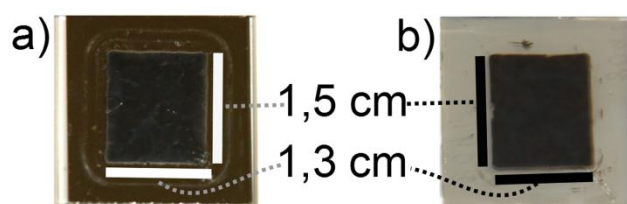

[FigureA5] Photographs of  $\text{Cu}_2\text{ZnSnS}_4$  layers on a) Mo and b) FTO Substrates

### Fitting procedure and parameters

The data obtained from the In-situ transmission measurements was fitted by a Formula derived from the combination of two formulas. The first is Lambert-Beers law a

$$I = I_0 \exp(-\alpha cx), \quad (1)$$

where  $I$  is the light intensity of a light source with initial intensity  $I_0$  at a distance  $x$  after crossing a medium with the absorption coefficient  $\alpha$  of concentration  $c$ . The second formula describes the time evolution of the NC concentration in dispersion during the EPD as presented in [1]:

$$c(t) = \frac{w_0}{V} \exp(-kt), \quad (2)$$

with the Volume:  $V$ , the initial weight of NC in dispersion:  $w_0$ , the time:  $t$  and the kinetic parameter:  $k = S \cdot \mu / V$ , where  $S$  denotes the deposited area and  $\mu$  the electrophoretic mobility. By combining (1) and (2) we obtain:

$$I = I_0 \exp(-C \cdot \exp(-kt)), \quad (3)$$

where the absorption parameter  $C$  is defined as  $C = \frac{\alpha x w_0}{V}$ . The values of  $C$  depend on the initial conditions  $C = -\ln(I(0))$ . In order to imply the possibility of retardation, the variable  $t_i$  was introduced resulting in

$$I = I_0 \exp(-C \cdot \exp(-k(t - t_i))). \quad (4)$$

Before fitting the data was normalized by dividing the whole dataset by an average of the stable domain (after depletion), to obtain  $I_0 \sim 1$ . This follows from the assumption that all the dispersions lead to the same intensity when depleted. The absorption parameter  $C$  was determined by the initial transmission value:  $C = -\ln(I(0))$ . The Parameters of the fitted curves are given below in Tab. II and Tab. III together with the respective value of  $R^2$ .

Tab. II: Acetonitrile variation

| Acetonitrile ratio | $I_0$ | Absorption parameter $C$ | Kinetic Parameter $k$<br>[ $s^{-1} \times 10^{-2}$ ] | Retardation time $t_i$<br>s | $R^2$ |
|--------------------|-------|--------------------------|------------------------------------------------------|-----------------------------|-------|
| 0                  | -     | -                        | -                                                    | -                           | -     |
| 25                 | 1.02  | 2.77                     | $1.34 \pm 0.01$                                      | $69.4 \pm 0.7$              | 0.993 |
| 50                 | 1.03  | 2.51                     | $1.14 \pm 0.01$                                      | $0.0 \pm 0.6$               | 0.994 |
| 75                 | 0.99  | 3.16                     | $2.06 \pm 0.02$                                      | $1.9 \pm 0.4$               | 0.994 |
| 100                | 0.99  | 3.90                     | $3.08 \pm 0.03$                                      | $0.7 \pm 0.4$               | 0.990 |

Tab. III: Voltage variation

| Voltage | $I_0$ | Absorption parameter $C$ | Kinetic Parameter $k$<br>[ $s^{-1} \times 10^{-2}$ ] | Retardation time $t_i$<br>s | $R^2$ |
|---------|-------|--------------------------|------------------------------------------------------|-----------------------------|-------|
| 10      | -     | -                        | -                                                    | -                           | -     |
| 25      | 1.01  | 2.05                     | $9.92 \pm 0.06$                                      | $53.8 \pm 0.8$              | 0.993 |
| 50      | 1.00  | 1.92                     | $8.62 \pm 0.05$                                      | $32.4 \pm 0.8$              | 0.989 |
| 75      | 1.02  | 1.79                     | $7.81 \pm 0.04$                                      | $20.8 \pm 0.7$              | 0.994 |
| 100     | 1.01  | 2.02                     | $7.14 \pm 0.02$                                      | $8.8 \pm 0.4$               | 0.994 |
| 250     | 1.03  | 2.60                     | $6.09 \pm 0.02$                                      | $6.5 \pm 0.6$               | 0.980 |
